# Supplementary material
Source: PubMed Central journal article supplement (PMC3500409)

**Supplementary Fig. 1.** Comparison of the T<sub>2</sub>-weighted MR images of several established glioma models at 4.7 T. 9L (12 days post-implantation, 25 thousand cells implanted); F98 (11 days post-implantation, 25 thousand cells); U87MG (11 days post-implantation, 1 million cells); U251 (20 days post-implantation, 1 million cells).

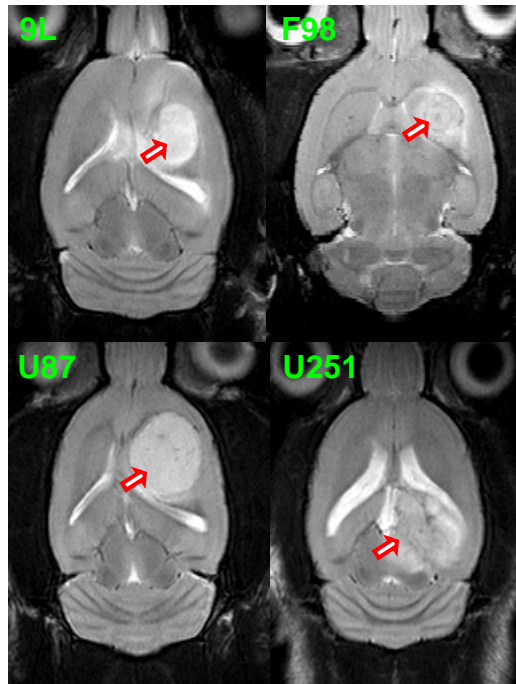

Supplement: NIHMS410402-supplement-11060_2012_974_MOESM1_ESM.pdf [file NIHMS410402-supplement-11060_2012_974_MOESM1_ESM.pdf]
