# Supplementary material
Source: PubMed Central journal article supplement (PMC3500409)

**Supplementary Fig. 2.** T<sub>2</sub>-weighted MR images in the coronal plane of SF188/V+ human glioma xenografts in a rat at different time points post-implantation (3 million cells implanted). The tumor was visual at 2 and 3 weeks post-implantation, but it almost disappeared at 6 weeks post-implantation.

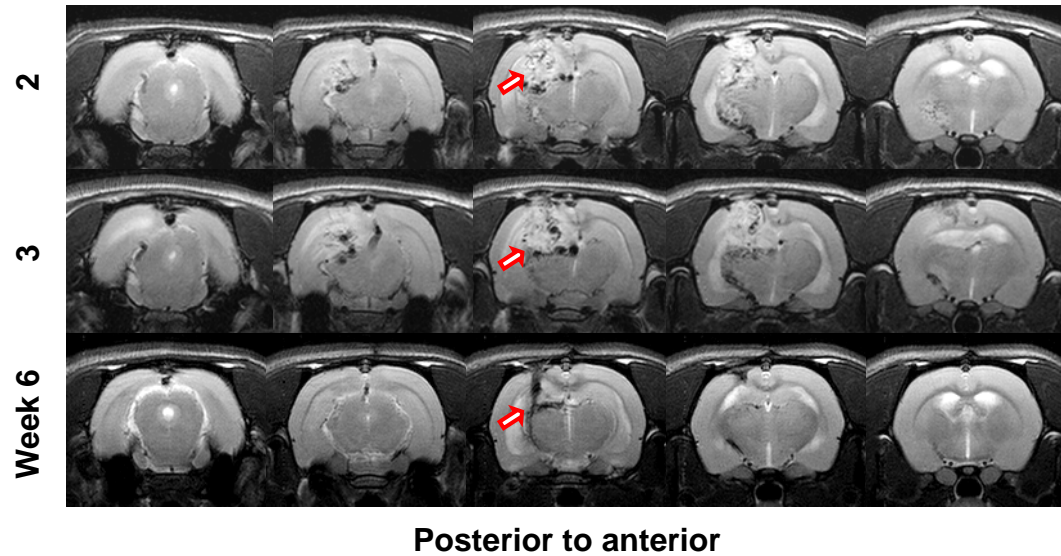

Supplement: NIHMS410402-supplement-11060_2012_974_MOESM2_ESM.pdf [file NIHMS410402-supplement-11060_2012_974_MOESM2_ESM.pdf]
